## The deubiquitylase USP9X controls ribosomal stalling

Anne Clancy<sup>1</sup>, Claire Heride<sup>1,4#</sup>, Adán Pinto-Fernández<sup>2#</sup>, Andreas Kallinos<sup>1</sup>, Katherine J. Kayser-Bricker<sup>3,8</sup>, Weiping Wang<sup>3</sup>, Victoria Smith<sup>1</sup>, Hannah Elcocks<sup>1</sup>, Simon Davis<sup>2</sup>, Shawn Fessler<sup>3</sup>, Crystal McKinnon<sup>3</sup>, Marie Katz<sup>3</sup>, Tim Hammonds<sup>4,9</sup>, Neil P. Jones<sup>4</sup>, Jonathan O'Connell<sup>3</sup>, Bruce Follows<sup>3</sup>, Steven Mischke<sup>3</sup>, Justin A. Caravella<sup>3</sup>, Stephanos Ioannidis<sup>3,10</sup>, Christopher Dinsmore<sup>3,11</sup>, Sunkyu Kim<sup>3,12</sup>, Axel Behrens<sup>5</sup>, David Komander<sup>6,7</sup>, Benedikt M. Kessler<sup>2</sup>, Sylvie Urbé<sup>1\*</sup>, Michael J. Clague<sup>1\*</sup>

<sup>1</sup>Dept. of Cellular and Molecular Physiology, Institute of Translational Medicine, University of Liverpool, Liverpool, L69 3BX, UK, <sup>2</sup>Target Discovery Institute, Nuffield Department of Medicine, University of Oxford, Roosevelt Drive, Oxford OX3 7FZ, UK, <sup>3</sup>FORMA Therapeutics, 500 Arsenal Street, Watertown, Massachusetts 02472, USA, <sup>4</sup>CRUK Therapeutic Discovery Laboratories, London Bioscience Innovation Centre, London NW1 0NH, UK, <sup>5</sup>Adult stem cell laboratory; The Francis Crick Institute, 1 Midland Road, London NW1 1AT, UK, <sup>6</sup>Ubiquitin Signalling Division, The Walter and Eliza Hall Institute of Medical Research, 1G Royal Parade, Parkville, VIC 3052, Australia, <sup>7</sup>Department of Medical Biology, The University of Melbourne, Melbourne, VIC 3010, Australia.

Current addresses:

<sup>8</sup> Halda Therapeutics, 23 Business Park Dr, Branford, Connecticut. USA

<sup>9</sup> Locki Therapeutics, London Bioscience Innovation Centre, 2 Royal College Street, London NW1 0NH, UK

<sup>10</sup>H3 Biomedicine, 300 Technology Square, Cambridge, MA 02139, USA

<sup>11</sup> Third Rock Ventures, 29 Newbury Street, Boston, MA 02116, USA

<sup>12</sup> Incyte, 1801 Augustine Cut-off, Wilmington, DE 19803, USA

#These authors contributed equally.

\*corresponding authors: [clague@liv.ac.uk](mailto:clague@liv.ac.uk), [urbe@liv.ac.uk](mailto:urbe@liv.ac.uk)

Key words: ubiquitin, deubiquitylase, USP9X, ribosomal stalling, DUB inhibitor, translation, ZNF598, Makorin

## Abstract

When a ribosome stalls during translation, it runs the risk of collision with a trailing ribosome. Such an encounter leads to the formation of a stable di-ribosome complex, which needs to be resolved by a dedicated machinery. The initial stalling and the subsequent resolution of di-ribosomal complexes requires activity of Makorin and ZNF598 ubiquitin E3 ligases respectively, through ubiquitylation of the eS10 and uS10 sub-units of the ribosome. It is common for the stability of RING E3 ligases to be regulated by an interacting deubiquitylase (DUB), which often opposes auto-ubiquitylation of the E3. Here, we show that the DUB USP9X directly interacts with ZNF598 and regulates its abundance through the control of protein stability in human cells. We have developed a highly specific small molecule inhibitor of USP9X. Proteomics analysis, following inhibitor treatment of HCT116 cells, confirms previous reports linking USP9X with centrosome associated protein stability and reveals loss of ZNF598 and Makorin 2. In the absence of USP9X or following chemical inhibition of its catalytic activity, steady state levels of Makorins and ZNF598 are diminished and the ribosomal quality control pathway is impaired.

## Introduction

Prompt sensing and resolution of aberrant protein translation is essential for the maintenance of protein homeostasis. Several circumstances can give rise to stalled ribosomes, such as insufficiency of a cognate acylated-tRNA, defective mRNA or faulty ribosomes [1, 2]. The most common cause of ribosomal stalling is thought to be the translation of poly(A), when a nascent mRNA is inappropriately polyadenylated within its coding region to generate a “non-stop” mRNA transcript lacking a stop codon [3, 4]. If a ribosome stalls during translation it risks being rear-ended by a trailing ribosome. This collision generates a stable di-ribosome complex with a defined structure, which is resolved by the engagement of a dedicated machinery [5, 6]. In such cases the E3-ligase ZNF598 ubiquitylates 40S complexes at specific sites on eS10 and uS10 sub-units at the di-ribosome interface [5, 7-9]. This prevents further translation and initiates quality control processes (e.g. degradation of the associated mRNA) and ribosomal recycling pathways through partially understood mechanisms [10]. ZNF598 is a human RING domain protein that shares homology with the yeast protein Hel2, the deletion of which promotes read-through of polybasic sequences [8, 11]. A recent report has provided evidence that the E3-ligases Makorin 1 (MKRN1) and potentially Makorin 2 (MKRN2) may complement the activity of ZNF598 in the ribosomal quality control pathway, by promoting the initial stalling of the leading ribosome as it encounters a polyA tract [12].

The function of E3-ligases, can be opposed by ~100 deubiquitylase (DUB) enzymes drawn from seven families [13]. RING E3s show a propensity to auto-ubiquitylate, leading to

their destabilisation, which can be rescued by the activity of interacting DUBs. The best known such example is provided by the association between USP7 and MDM2, which has made USP7 a prominent drug target, as a means to regulate levels of p53 [14]. Recent work, focused on this enzyme, has established proof of principle that selective small molecule inhibition amongst the USP family can be achieved [15-18]. USP9X is one of the most abundant members of the USP family and has been linked with many processes, including centrosome function, chromosome alignment during mitosis, EGF receptor degradation, chemo-sensitisation and circadian rhythms [19-23]. Loss of function mutations in females lead to congenital malformations and intellectual disability [24].

In this study we identify the E3 ligase ZNF598 as a USP9X binding partner and show that USP9X governs the stability of ZNF598. The loss or inhibition of USP9X leads to a substantive reduction in steady state levels of ZNF598 and Makorins that disables an effective response to the presence of stalled ribosomes.

## Results and discussion:

In a large scale proteomic study of the ribosome interactome, USP9X was the only DUB family member to be identified [25]. Furthermore, USP9X is also apparent within the set of ZNF598 interacting proteins, previously identified in a label free proteomic study [7]. We sought to confirm this interaction by immuno-precipitating FLAG-tagged ZNF598 transiently expressed in HEK293T cells (Figure 1). USP9X is clearly present in the IP containing ZNF598-FLAG and is absent from control lanes.

{Figure 1 about here}

We next compared the engineered USP9X<sup>-/-</sup> HCT116 colon cancer cells that have been described previously [19] with wild type cells of the same origin. As expected, the USP9X<sup>-/-</sup> cells show reduced levels of previously identified peri-centrosomal substrates CEP55, CEP131 and PCM1 [21, 22] (Figure 2A). ZNF598 levels are also greatly diminished in these cells (Figure 2A and Supplementary Figure 1). Two lines of argument suggest that this is not an effect on transcription, (i) endogenous ZNF598 mRNA levels are similar between the two cell lines (Figure 2B) and (ii) levels of exogenous HA-ZNF598 expression that is driven by a non-native promoter are also diminished in transfected cells (Figure 2C). We next treated these cells with cycloheximide and monitored the decay of the expressed HA-ZNF598. In wild type cells, levels of HA-ZNF598 remained stable over the 6 hours of incubation, whilst in the USP9X<sup>-/-</sup> cells the levels significantly decline to about ~60% in the same period (Figure 2D). The most parsimonious explanation of these combined results is that USP9X interacts with ZNF598 and regulates its steady state levels through the control of its stability.

{Figure 2 about here}

To demonstrate that this requires the catalytic activity of USP9X we took advantage of a highly selective small molecule inhibitor FT709 (Figure 3A, chemical structure, 3B-3H). We identified USP9X inhibitors using a ubiquitin-TAMRA fluorescence polarization HTS assay, screening the inhibitory potential of a diverse collection of approximately 140,000 compounds available at FORMA Therapeutics. Primary hits were further validated for direct USP9X binding by biophysical techniques such as surface plasmon resonance (SPR). Optimization of hits with respect to activity and physicochemical properties resulted in a series of compounds that included FT709.

FT709 is potent in a biochemical assay with an IC<sub>50</sub> of 82 nM (Fig 3B). Modulation of CEP55 expression in BxPC3 pancreatic cancer cells showed an IC<sub>50</sub> of 131 nM (Fig 3C). The

selectivity of FT709 was tested across more than 20 DUBs in a biochemical assay (Table 1) and was inactive across the panel ( $IC_{50} > 25 \mu M$ ). FT709 shows vastly improved specificity over the compound WP1130, which has been previously used as a USP9X inhibitor tool compound [26, 27]. FT709 competes with an active site probe (HA-UbC2Br) with an  $IC_{50}$  of  $\sim 0.5 \mu M$  when applied to MCF7 breast cancer cell lysates and  $\sim 5 \mu M$  to intact MCF7 cells (Figure 3D-F and Supplementary Figure 2). Immunoprecipitation from cell lysates labelled with the active site probe HA-UbC2Br, revealed that USP9X is uniquely sensitive to this compound, within a set of 23 DUBs quantified by mass spectrometry (Figure 3G,H and Supplementary Figure 2).

Acute inhibition with FT709, recapitulates gene deletion of USP9X in HCT116 cells, leading to reduction of ZNF598 (Figure 4A). We conducted a wider survey of protein expression following USP9X inhibition through quantitative mass spectrometry (Figure 4B, Supplementary Table 1). Amongst a small number of proteins that decrease by more than two-fold following inhibitor treatment, known USP9X substrates are prominent. These include the (peri)-centrosomal proteins PCM1, CEP55 and CEP131 [21, 22] and the mitotic kinase, TTK, also known as Monopolar spindle 1 (Mps1) kinase (Figure 4B,C) [28]. ZNF598 is also found within this cohort, in alignment with our Western blot analysis (Figure 4A,B). Intriguingly a second RING E3-ligase MKRN2, that has been linked to ribosome stalling, is equally identified as a clear outlier (Figure 4B, C) [12]. Accordingly MKRN2 is also reduced in USP9X<sup>-0</sup> cells (Figure 4D). Note that these are the only RING E3 ligases, contained within the proteomic dataset (>6000 proteins), which show this magnitude of response to USP9X inhibition (Supplementary Table 1).

[Figures 3 and 4 about here]

We next asked if the effects of USP9X ablation upon ZNF598 and MKRN2 could be extended to another cell type, HEK293 cells. We used a set of 4 individual gRNAs designed to target USP9X, which were packaged in an expression plasmid that also codes for Cas9 (px459-pSpCas9(BB)-2A-Puro-v2). Plasmids were transfected either individually, or as a pool, and cell populations were harvested after 168 hours of selection with puromycin. The pooled transfection effectively ablated USP9X protein expression across the cell population, leading to a correspondingly stark reduction in ZNF598 and MKRN2 levels. ZNF598 loss, achieved through the same transient CRISPR/Cas9 based approach or in a stable knock-out cell line showed no reciprocal effect on USP9X levels (Figure 5A).

The HEK293 cells used in this study (HEK293-Flp-IN TREX GFP-P2A-(K<sup>AAA</sup>)<sub>21</sub>-P2A-RFP) have been engineered to express a reporter system for terminal ribosomal stalling [8]. The reporter cassette contains GFP (N-terminal) and RFP (C-terminal) separated by a FLAG-tagged stalling reporter (SR) incorporating a polyA stretch of twenty-one codons (K<sup>AAA</sup>)<sub>21</sub>

(Figure 5B). This is flanked by viral P2A sequences, at which ribosomes skip formation of a peptide bond, without interrupting translation elongation. Consequently, unimpaired translation generates 3 proteins (GFP, FLAG-SR, RFP) in equal amounts. Stalling at the FLAG-SR aborts translation prior to RFP synthesis, leading to a sub-stoichiometric RFP:GFP ratio. Failure to effectively respond to stalled ribosomes allows eventual read-through and a consequent rise in the RFP:GFP ratio that can be assessed by fluorescence activated cell sorting (Figure 5B, schematic diagram)[8]. As reported previously, an isogenic reporter cell line, in which the ZNF598 gene has been deleted, shows an enhanced RFP:GFP ratio when compared to parental cells consistent with read-through, due to failure of the ribosomal stalling response [8]. Using the pooled USP9X gRNA cells, that show highly reduced levels of both USP9X and ZNF598, we could recapitulate this phenomenon. We also analysed 3 of the cell populations treated with individual gRNAs as represented in Fig 5A that show varying effectiveness for USP9X depletion. Guide 1 serves as a control because it was ineffective in editing the USP9X gene and accordingly shows no change in the RFP:GFP ratio. Guide 4 generates two distinct populations with about 50% showing an enhanced RFP:GFP ratio, whilst Guide 7 shows a uniform enhancement of this ratio reminiscent of the effect of ZNF598 deletion and comparable to the pooled gRNA sample (Figure 5C). Importantly, we were able to recapitulate polyA read through with FT709, implicating USP9X enzymatic activity, and providing a pharmaceutical approach to counteract ribosomal stalling (Figure 5D). In this condition, effects on ZNF598 levels were less dramatic in this cell line, but were accompanied by losses of both MKRN1 and MKRN2. We propose that USP9X inhibition may promote read through by a combined effect on each of these 3 RING E3 ligases linked to the ribosomal quality control pathway (Figure 5E).

{Figure 5 about here}

## Conclusions

USP9X is for the most part a non-essential DUB family member, that is nevertheless expressed at relatively high levels [29, 30]. Multiple biological functions have been ascribed to USP9X that include roles in apoptosis, Wnt signaling and mitotic check-point control [31, 32] [33]. Our proteomics data most strongly support previously established links to centrosome biology [21, 22, 34]. Here, we reveal a new biological role for USP9X in the resolution of stalled ribosomes, which is supported by unbiased proteomics. We propose that this is principally related to its governance of ZNF598 stability, but could also extend to Makorin family members [12]. It is possible that USP9X could also play a more direct role in the deubiquitylation of ribosomal sub-units themselves during stalling resolution. However this is difficult to unravel from effects upon their ubiquitin conjugation by the E3 ligases described

here. Moreover, other DUBs (USP21, OTUD3) have recently been linked with this function [35]. The non-uniform dynamics of ribosomal processing, duration and resolution of stalling may have important implications for protein folding, mRNA turnover and for the integrated stress response (ISR) [6, 36]. Recent studies have also shown that ribosomal collisions can result in +1 frame-shifting when the no-go RNA decay pathway is compromised [37]. Our introduction of a highly specific USP9X tool compound inhibitor will enable further enquiry into pathways previously linked to USP9X, which should now include global profiling of protein translation.

## Methods

### *Chemical compound*

FT709 used in this study was prepared by the procedures described in detail previously [38].

### *Cell culture*

HEK293T cells were cultured in DMEM with GlutaMAX+ 10% tetracycline-free FBS, HEK293 Flp-IN 293 Trex K<sup>(AAA)</sup>21 wt or ZNF598ko were cultured in DMEM with GlutaMAX+ 10% tetracycline-free FBS 15 µg/ml blasticidin, 100 µg/ml hygromycin. To induce reporter expression 1µgml<sup>-1</sup> Doxycycline was added 24 hr before harvesting. HCT116 and HCT116 USP9X<sup>-/-</sup> were cultured in McCoy's media + 10% FBS. MCF7 cells were cultured in DMEM medium supplemented with 10% FCS, 1% penicillin/streptomycin and 1% glutamine at 37°C and 5% CO<sub>2</sub>. Cells were routinely checked for mycoplasma. For cycloheximide assay, cells were treated for the indicated times with 100µg/ml cycloheximide and harvested 24 hr post transfection.

### *Transfection*

For transient transfection, 2µg total DNA (per well of a 6 well plate) was transfected using Genejuice (Novagen) according to manufacturer's instructions. Cells were harvested 24-168 hr post transfection.

### *Lysis and Western Blot analysis*

Cultured cells were lysed for 10 min at 4°C in RIPA buffer (10 mM Tris-HCl pH 7.5, 150 mM NaCl, 1% Triton X-100, 0.1% SDS, 1% sodium deoxycholate) supplemented with mammalian protease inhibitor cocktail (SIGMA). Proteins were resolved using SDS-PAGE (Invitrogen NuPage gel 4-12%), transferred to nitrocellulose membrane, blocked in 5% fat-free milk or 5% bovine serum albumin in TBS supplemented with Tween-20, and probed with primary antibodies overnight. Visualisation and quantification of Western blots were performed using IRdye 800CW and 680LT coupled secondary antibodies and an Odyssey infrared scanner (LI-COR Biosciences, Lincoln, NE).

### *Co-IP*

Cells were lysed in TNTE buffer (10mM Tris-Cl pH 7.5, 150mM NaCl 0.3% Triton-X100, 5mM EDTA) supplemented with mammalian protease inhibitor cocktail (Sigma). 750µg total protein was then incubated with 20µg prewashed FLAG affinity gel (Sigma) for 2h at 4°C, washed with TBS buffer (10mM Tris-Cl pH 7.5, 100mM NaCl) and eluted in sample buffer (62.5mM Tris-Cl pH 6.8, 3% SDS, 10% glycerol, 3.2% β-mercaptoethanol). Immunoprecipitates were then analysed by western blot as above.

### *RNA isolation and Reverse Transcription qPCR*



Total RNA was isolated from HCT116, HCT116 USP9x<sup>-/-</sup>, Flp-IN 293 Trex K<sup>(AAA)</sup>21 wt and Flp-IN 293 Trex K<sup>(AAA)</sup>21 ZNF598 KO using the Qiagen RNA extraction kit (74106). cDNA was generated using 1 µg RNA and the Thermo Scientific RevertAir H Minus reverse transcriptase (Fisher Scientific UK: 11541515) supplemented with RNasin (Promega:N251S), PCR nucleotide mix (Promega: U144B) and oligo (dT) 15 Primer (Promega: C1101). qPCRs were performed in triplicate using primers against ZNF598, USP9x, USP9y, actin (see Table 2 for sequences) and iTaq Mastermix (BioRad: 172-5171) in a BioRad CFX Connect real time system. The mean Ct values were normalised to actin ( $\Delta Ct = Ct_{\text{target}} - Ct_{\text{actin}}$ ), raised to the exponent of  $2^{-\Delta Ct}$  and normalised to the respective wild-type control cell line to generate  $2^{-\Delta\Delta Ct}$ .

### **FACS**

Primers as detailed in Table 2 were cloned into px459-pSpCas9(BB)-2A-Puro-v2 vector at the BbsI site. These were transfected into Flp-IN 293 Trex K<sup>(AAA)</sup>21 wt and ZNF598 ko using Genejuice (Novagen). 24 hours post-transfection, media was changed and 1µg/ml Puromycin included. Cells were then cultured for 7 days before harvesting for western blot and FACS analysis. For FACS, cells were trypsinised, counted, resuspended in 10% tetracycline free FBS in PBS and analysed on a FACS Aria III in conjunction with FlowJo software.

### **DUB biochemical assay**

The assay was performed in a final volume of 6 µL in assay buffer containing 20 mM Tris buffer pH8, 0.03% bovine γ globulin, 0.01% Triton X-100 and 1 mM glutathione. Nanoliter quantities of 10-point, 3-fold serial dilutions in DMSO were pre-dispensed into 1536 assay plates for a final top concentration between 25 to 33.3mM and subsequent half-log dilutions. 2X DUB (0.025nM final concentration) was added and pre-incubated for 30 minutes at room temperature. 2X Ub-Rhodamine (25 nM final concentration) was added to initiate the reaction. Fluorescence readings (Ex: 485 nm, Em: 535 nm) were acquired over 12 minutes (Envision reader). The slope of the data from each point was used to determine IC<sub>50</sub>.

For all assays, data were reported as percent inhibition compared with control wells. IC<sub>50</sub> values were determined by curve fitting of the standard 4 parameter logistic fitting algorithm included in the Activity Base software package: IDBS XE Designer Model205. Data were fitted using the Levenburg Marquardt algorithm. Results presented are based on 3 independent experiments performed in quadruplicates.

### **MSD assay for CEP55**

BxPC-3 cells were seeded in 96-well plates and exposed to FT709 (20  $\mu$ M top concentration, 1:2 serial dilutions) for 6 hours. Cell lysates were prepared in RIPA buffer and stored at  $-80^{\circ}\text{C}$  until analysis. Samples were analysed by an MSD Elisa assay (Pacific Biolabs) using a CEP55 antibody (Novux, 1:500 dilution in PBS) captured overnight at  $4^{\circ}\text{C}$ , 30 $\mu$ L lysates per well, 30  $\mu$ L of CEP55 Ab (CST#81693) diluted 1:2000 in 1% blocker A/PBS and 30  $\mu$ L per well of a 1:4000 diluted Goat anti-Rabbit Sulfo-tag, 1% Blocker A/PBS. Plates were read on a MSD Sector Imager 2400. Results were transformed as % DMSO controls and curves fitted using a non-linear regression to determine the IC50. Results presented are based on duplicate values.

### *DUB profiling assays using Ub-based active site directed probes*

Molecular probes based on the ubiquitin scaffold were generated and used essentially as described [39, 40]. In brief, HA-tagged Ubiquitin bromoethyl (HA-UbC2Br) was synthesised by expressing the fusion protein HA-Ub<sub>75</sub>-Intein-Chitin binding domain in E.Coli BL21 strains [41]. Bacterial lysates were prepared and the fusion protein purified over a chitin binding column (NEB labs, UK). HA-Ub<sub>75</sub>-thioester was obtained by incubating the column material with mercaptosulfonate sodium salt (MESNa) overnight at  $37^{\circ}\text{C}$ . HA-Ub<sub>75</sub>-thioester was concentrated to a concentration of  $\sim 1\text{mg/ml}$  using 3,000 MW filters (Sartorius) and then desalted against PBS using a PD10 column (GE Healthcare). 500  $\mu$ L of 1-2mg/mL of HA-Ub<sub>75</sub>-thioester was incubated with 0.2mmol of bromo-ethylamine at pH 8-9 for 20 minutes at room temperature, followed by a desalting step against phosphate buffer pH 8 as described above. Ub probe material was concentrated to  $\sim 1\text{mg/ml}$ , using 3,000 MW filters (Sartorius), and kept as aliquots at  $-80^{\circ}\text{C}$  until use.

### *DUB competition assays with cell extracts and with cells (in situ)*

Crude MCF7 cell extracts were prepared as described previously using glass-bead lysis in 50mM Tris pH 7.4, 5mM  $\text{MgCl}_2$ , 0.5mM EDTA, 250mM sucrose, 1mM DTT [40, 41]. For experiments with crude cell extracts, 50 $\mu$ g of MCF7 cell lysate was incubated with different concentrations of FT709 for one hour at  $37^{\circ}\text{C}$ , followed by addition of 1 $\mu$ g HA-UbC2Br and incubation for 5 minutes at  $37^{\circ}\text{C}$ . Incubation with Ub-probe was optimised to minimise replacement of non-covalent inhibitor FT709 by the covalent probe. Samples were then subsequently boiled in reducing SDS-sample buffer, separated by SDS-PAGE and analysed by Western Blotting using anti-HA (1:2000), anti-USP9x (CST, 1:1000) or beta Actin (1:2000) antibodies.  $5 \times 10^6$  intact MCF7 cells were incubated with different concentrations of inhibitors

in cultured medium for 4 hours at 37°C, followed by glass-bead lysis, labelling with HA-UbC2Br probe and analysis by SDS-PAGE and Western blotting as described above.

### ***Mass spectrometry based DUB inhibitor profiling assays***

Ub-probe pulldown experiments in presence of different concentrations of the inhibitors FT709 were performed essentially as described [39, 40] with some modifications. In brief, immuno-precipitated material from 500µg-1mg of MCF-7 cell crude extract was subjected to in-solution trypsin digestion and desalted using C18 SepPak cartridges (Waters) based on the manufacturer's instructions. Digested samples were analyzed by nano-UPLC-MS/MS using a Dionex Ultimate 3000 nano UPLC with EASY spray column (75µm x 500 mm, 2µm particle size, Thermo Scientific) with a 60 minute gradient of 0.1% formic acid in 5% DMSO to 0.1% formic acid to 35% acetonitrile in 5% DMSO at a flow rate of ~250nl/min (~600bar/40°C column temperature). MS data was acquired with an Orbitrap Q Exactive High Field (HF) instrument in which survey scans were acquired at a resolution of 60,000 @ 400m/z and the 20 most abundant precursors were selected for CID fragmentation. From raw MS files, peak list files were generated with MSConvert (Proteowizard V3.0.5211) using the 200 most abundant peaks/spectrum. The Mascot (V2.3, Matrix Science) search engine was used for protein identification at a false discovery rate of 1%, mass deviation of 10ppm for MS1 and 0.06 Da (Q Exactive HF) for MS2 spectra, cys carbamidylation as fixed modification, met oxidation and Gln deamidation as variable modification. Searches were performed against the UniProtKB human sequence data base (retrieved 15.10.2014). Label-free quantitation was performed using MaxQuant Software (version 1.5.3.8), and data further analysed using GraphPad Prism software (v7) and Microsoft Excel. Statistical test-s ANOVA (multiple comparison; Original FRD method of Benjamini and Hochberg) was performed using GraphPad Prism software [42].

### ***SILAC based proteome analysis of FT709-treated HCT116 cells***

HCT116 cells were grown in SILAC DMEM supplemented with 10 % dialysed FBS (Dundee Cell Products) at 37°C and 5 % CO<sub>2</sub>. To generate light, medium and heavy stable isotope-labelled cells, arginine- and lysine-free DMEM medium was supplemented with 200 mg/L L-proline and either L-lysine (Lys0) together with L-arginine (Arg0) ("Light"), L-lysine-<sup>2</sup>H<sub>4</sub> (Lys4) with L-arginine-U-<sup>13</sup>C<sub>6</sub> (Arg6) ("Medium") or L-lysine-U-<sup>13</sup>C<sub>6</sub>-<sup>15</sup>N<sub>2</sub> (Lys8) with L-arginine-U-<sup>13</sup>C<sub>6</sub>-<sup>15</sup>N<sub>4</sub>

(Arg10) (“Heavy”) at final concentrations of 84 mg/L for the arginine and 146 mg/L for the lysine until fully metabolically labelled. Cells were treated with DMSO or 10  $\mu$ M FT709 for 4 hours or 24 hours, prior to lysis in 50 mM Tris pH 6.8, 2 % SDS, 10 % glycerol. Relative protein concentrations of the lysates were determined using a BCA-assay (Thermo-Fisher) and “Light”, “Medium” and “Heavy” labelled lysates were combined in a 1:1:1 ratio.

### *Deep proteome workflow*

Protein extracts (1.2 to 1.5 mg) containing SDS were reduced with 5 mM dithiothreitol, alkylated with 20 mM iodoacetamide and then subjected to methanol/chloroform extraction. Protein pellets were resuspended in 6 M urea by vortexing and sonication, then diluted to a final concentration of 1 M prior to in-solution digestion with 0.2  $\mu$ g/ $\mu$ l trypsin (Sequencing grade (Promega) overnight at 37°C. Off-line high-pH reverse-phase prefractionation was performed on the digested material as previously described [43], with the exception that eluted peptides were concatenated down to 10 fractions. Peptide fractions were analysed in technical replicates by nano-UPLC-MS/MS using a Dionex Ultimate 3000 nano UPLC with EASY spray column (75  $\mu$ m x 500 mm, 2  $\mu$ m particle size, Thermo Scientific) with a 60 minute gradient of 2% acetonitrile, 0.1% formic acid in 5% DMSO to 35% acetonitrile, 0.1% formic acid in 5% DMSO at a flow rate of ~250nl/min. MS data was acquired with an Orbitrap Q Exactive HF instrument in which survey scans were acquired at a resolution of 60,000 at 200m/z and the 20 most abundant precursors were selected for HCD fragmentation with a normalised collision energy of 28.

### *Data analysis*

All raw MS files from the biological replicates of the SILAC-proteome experiments were processed with the MaxQuant software suite; version 1.5.3.8 using the Uniprot database (uniprotHumanUP000005640.fasta-retrieved in July 2015) and the default settings [44]. The minimum required peptide length was set to 6 amino acids and two missed cleavages were allowed. Cysteine carbamidomethylation was set as a fixed modification, whereas oxidation and acetyl N terminal were considered as variable modifications. ProteinGroup text files were further processed using Excel (see Supplementary Table 1) and the log<sub>2</sub> of the normalised ratios were plotted using JMP software (version 13.0.0).

## **Acknowledgements**

We thank Ramanujan Hegde (LMB, Cambridge) for his provision of ribosomal stalling reporter assay reagents.

Table 1

| DUB   | IC50<br>( $\mu$ M) |
|-------|--------------------|
| USP1  | >25.8              |
| USP2  | >26.7              |
| USP4  | >33.3              |
| USP5  | >33.3              |
| USP7  | >25.8              |
| USP8  | >25                |
| USP9x | 0.082              |
| USP10 | >33.3              |
| USP11 | >33.3              |
| USP12 | >33.3              |
| USP13 | >26.7              |
| USP15 | >26.7              |
| USP18 | >27.9              |
| USP22 | >26.7              |
| USP24 | >26.7              |
| USP25 | >26.7              |
| USP28 | >26.7              |
| USP33 | >26.7              |
| USP36 | >26.7              |
| USP37 | >33.3              |
| USP47 | >33.3              |

Table 2 - List of reagents used in this study

|                                                 |                                   |
|-------------------------------------------------|-----------------------------------|
| <b>Cells</b>                                    |                                   |
| Flp-IN 293 Trex K <sup>(AAA)</sup> 21 wt        | Juszkiewicz and Hegde - 2017      |
| Flp-IN 293 Trex K <sup>(AAA)</sup> 21 ZNF598 KO | Juszkiewicz and Hegde - 2018      |
| HCT116                                          | ATCC CCL-247                      |
| HCT116 USP9x -/0 Neo+                           | Harris, Mims, Bunz 2012           |
| HEK293T                                         | Gift of Maarit Suomalainen        |
| BxPC3                                           | ATCC CRL-1687                     |
| MCF7                                            | ATCC HTB-22                       |
| px459-pSpCas9(BB)-2A-Puro-v2                    | Addgene #62988                    |
| pcDNA3.1-ZNF598-TEV-3xFLAG_Addgene              | Juszkiewicz and Hegde - 2017      |
| pCMV-HA-ZNF598                                  | This study                        |
|                                                 |                                   |
| <b>Antibodies</b>                               |                                   |
| Actin                                           | Sigma A2266                       |
| Actin                                           | Abcam Ab6276                      |
| Anti ribosomal protein S10 antibody [EPR8545]   | Abcam ab151550                    |
| Anti-HA High Affinity                           | Roche 11867423001                 |
| c-Myc (D84C12) XP                               | Cell Signaling Technology #5606   |
| CEP131 (AZ11)                                   | Abcam ab99379                     |
| CEP55 (D1L4H)                                   | Cell Signalling Technology #81693 |
| CEP55                                           | Novus                             |
| GFP                                             | Custom made                       |
| HA                                              | Roche 12CA5                       |
| HGS (HRS)                                       | Everest Biotech EB07211           |
| MKRN2                                           | Abcam ab72055                     |
| Myc Clone 4A6                                   | Millipore 05-724                  |
| p53-DO1                                         | Santa Cruz sc-126                 |
| PCM-1 (G2000)                                   | Cell Signaling Technology #5213   |
| TTK Cell Signaling (NEB)                        | Cell Signaling Technology #5469   |
| Anti ribosomal protein S10 [EPR8545]            | abcam ab151550                    |

|                            |                                    |
|----------------------------|------------------------------------|
| USP9X                      | Bethyl A301-350A                   |
| ZNF598                     | Abcam ab80458                      |
| ZNF598 antibody [N1N3]     | GeneTex GTX119245                  |
| NBP1-84659 ZNF598 Antibody | Novus Bio techne NBP1-84659        |
|                            |                                    |
| <b>Primers</b>             | Forward sequence                   |
| AC_USP9y-q_F               | ATG AGC CCT CTC CAT CAG            |
| AC_USP9y-q_R               | GAC CTT AGT GCA TAG TCA TAA AG     |
| AC_USP9x-q_F               | ACA TGA GTC GCC TCC ACC TG         |
| AC_USP9x-q_R               | GCC TGG GTG CAC AGT CTT G          |
| AC_ZNF598_qPCR2_F          | GCT CAT CCA GTC CAT CAG GG         |
| AC_ZNF598_qPCR2_R          | GCA GGA CCA GCA GCT CAT TA         |
| ACTB_Fnew9-06              | CAC CTT CTA CAA TGA GCT GCG TGT G  |
| 1611_ACTB Rnew9-06         | ATA GCA CAG CCT GGA TAG CAA CGT AC |
| CH-gUSP9#1                 | CACC GATCAACAGGCCTCGATGGG          |
| CH-gUSP9#2                 | CACC G ATGCTTCACTTTTAACATCA        |
| CH-gUSP9#4                 | CACC G ATTCTTGCCATTGAAGGCAC        |
| CH-gUSP9#7                 | CACC G ATTCATGTAACAAGTAGCAC        |
| CH-gZNF598#1               | CACC G TAGAGCAGCGGTAGCACACC        |



## Legends

**Figure 1: USP9X co-immunoprecipitates with Flag-tagged ZNF598.** HEK293T cells were transfected with ZNF598-Flag or Flag alone (pCMV-Tag2B) and cell lysates were subjected to immunoprecipitation (IP) with Flag-antibody coupled agarose beads. IPs were probed alongside 5% of the input as indicated. Arrowhead indicates ZNF598-Flag; asterisk indicates a non-specific band.

**Figure 2: ZNF598 is destabilised in USP9X KO cells.** **A** - HCT116 or HCT116 USP9x<sup>-0</sup> lysates were analysed by immunoblot with the indicated antibodies. **B** - qRT-PCR reactions for ZNF598, USP9X and USP9Y (normalised to Actin) were performed with cDNA derived from the indicated cell lines. The mean of three independent biological replicates is shown and error bars indicate the standard deviation. **C** - HCT116 or HCT116 USP9x<sup>-0</sup> cells were transfected with 0, 0.2, 0.4, 0.8 or 1.6µg HA-ZNF598 and 0.2µg GFP as a transfection control, and lysates analysed by immunoblot with the indicated antibodies. Graph shows HA-ZNF598 relative to co-transfected GFP. **D** - HCT116 or HCT116 USP9x<sup>-0</sup> cells were transfected with 0.2µg HA ZNF598 and treated for the indicated times with 100µg/ml Cycloheximide (CHX). Lysates (8µg for HCT116 and 20µg HCT116-USP9x<sup>-0</sup>) were probed with the indicated antibodies. Graph shows the average of 4 independent experiments, error bars represent the standard deviation. TPS: Total Protein Stain.

**Figure 3: Characterisation of a highly selective USP9X inhibitor.** **A** - Chemical structure of FT709. **B** *In vitro* potency of FT709 against USP9X. **C** BXPC3 cell-based potency of FT709 for reduction of CEP55. **D, E, F** - Cell lysates (D) or intact MCF7 cells (E) were incubated with FT709 (30 minutes at 25°C for cell extracts, 3 hours at 37°C for cells) at the indicated concentrations. Cells were lysed, and extracts incubated with 0.1 µg HA-UbC2Br probe for 5 min at 37°C, followed by SDS-PAGE analysis. Samples were immunoblotted with USP9X and HA antibodies as indicated. Arrow indicates HA-probe labelled band corresponding to the USP9X~Ub probe adduct. Modification of USP9X with a ubiquitin probe (USP9X~Ub) was lost with increasing concentrations of inhibitor. **F** - quantitation of Western blots **G, H** - HA-based immunoprecipitation of HA-UbC2Br probe labelled DUBs from cell lysates

incubated first with DMSO, 1 or 10  $\mu$ M FT709 for one hour at 37°C. Immuno-precipitated proteins were eluted and either analysed side by side with total lysate samples by immunoblotting (TL; Total lysate; EL: Eluate) or were subjected to mass spectrometry-based quantification in three technical replicates. Differences in DUB-probe binding were quantified for 23 identified DUBs and normalised relative to DMSO control. FT709 only affects USP9X (Dunnett multiple comparisons test; \*\*\*:  $p < 0.001$ ; see Methods for statistics and Supplementary Figure 2 for uncropped immunoblots).

**Figure 4: Inhibition of USP9X catalytic activity depletes ZNF598 and MKRN2 protein levels.**

**A** - HCT116 cells were treated for 4 or 24 hours with a selective USP9X inhibitor (FT709, 10 $\mu$ M). Cells were lysed in RIPA buffer and samples analysed by SDS-PAGE and immunoblotted for ZNF598 and USP9X. **B** - Correlation of two distinct experimental SILAC based proteomic datasets showing the de-enrichment of ZNF598 and MKRN2 alongside known USP9X substrates (in black type) in HCT116 cells treated for 24 h with USP9X inhibitor (FT709, 10  $\mu$ M). Outliers for which the ratio is either lower than  $\text{Log}_2(-1.0)$  or larger than  $\text{Log}_2(+1)$  in both datasets are shown in red. **C** - Western blot validation of USP9X inhibitor sensitive proteins identified in B. HCT116 were treated with FT709 at 5  $\mu$ M (CEP131), or 10  $\mu$ M (all other samples) and analysed as in A. TPS: Total Protein Stain. **D** - De-enrichment of MKRN2 in USP9X knockout cells. HCT116 or HCT116 USP9X<sup>-/-</sup> lysates were analysed by immunoblot with the indicated antibodies.

**Figure 5: USP9X ablation or inhibition impairs the ribosomal stalling response.**

**A** - HEK293 Flp-In T-Rex GFP-P2A-(KAAA)21-P2A-RFP wt cells (KAAA wt) were transfected with a plasmid containing Cas9 and gRNAs targeting USP9X or ZNF598. P = pool of USP9X guides, 1/2/4/7 = individual USP9X guides, Z = ZNF598 guide. Lysates were analysed 168 hrs after transfection and selection in Puromycin, by immunoblotting with the indicated antibodies. **B** - Schematic of the fluorescent ribosomal stalling reporter expressed in this cell line. If stalling is not efficiently resolved, read-through occurs, the Flag-SR and RFP are expressed. **C** - FACS analysis of the RFP:GFP ratio in KAAA wt or ZNF598ko cells following transfection with px459-pSpCas9(BB)-2A-Puro\_v2 containing

gRNA as indicated. Cells were gated for live singlets, then for GFP positive cells. Insets indicate the USP9X protein levels normalised to wt untransfected cells. **D** - FACS analysis of the RFP:GFP ratio in wt cells following inhibition of USP9X by FT709 for 72 hrs. **E** - KAAA wt cells were treated with indicated concentrations of FT709 as in D and analysed by immunoblotting with selected antibodies. TPS: Total Protein Stain.

**Supplementary Figure 1. ZNF598 antibody validation.** HEK293 Flp-In T-Rex GFP-P2A-(KAA)21-P2A-RFP wt or ZNF598 knockout (ko), and HCT116 wt or HCT116 USP9X<sup>-/-</sup> cell lysates were analysed by immunoblotting with the indicated antibodies.

**Supplementary Figure 2.** Full western blots of panels D, E and G shown in Figure 3.

## Bibliography

1. Ishimura, R., Nagy, G., Dotu, I., Zhou, H., Yang, X.L., Schimmel, P., Senju, S., Nishimura, Y., Chuang, J.H., and Ackerman, S.L. (2014). RNA function. Ribosome stalling induced by mutation of a CNS-specific tRNA causes neurodegeneration. *Science* *345*, 455-459.
2. Arthur, L.L., and Djuranovic, S. (2018). PolyA tracks, polybasic peptides, poly-translational hurdles. *Wiley Interdiscip Rev RNA*, e1486.
3. Oszolak, F., Kapranov, P., Foissac, S., Kim, S.W., Fishilevich, E., Monaghan, A.P., John, B., and Milos, P.M. (2010). Comprehensive polyadenylation site maps in yeast and human reveal pervasive alternative polyadenylation. *Cell* *143*, 1018-1029.
4. Arthur, L., Pavlovic-Djuranovic, S., Smith-Koutmou, K., Green, R., Szczesny, P., and Djuranovic, S. (2015). Translational control by lysine-encoding A-rich sequences. *Sci Adv* *1*.
5. Juskiewicz, S., Chandrasekaran, V., Lin, Z., Kraatz, S., Ramakrishnan, V., and Hegde, R.S. (2018). ZNF598 Is a Quality Control Sensor of Collided Ribosomes. *Mol Cell* *72*, 469-481 e467.
6. Collart, M.A., and Weiss, B. (2019). Ribosome pausing, a dangerous necessity for co-translational events. *Nucleic Acids Res*.
7. Garzia, A., Jafarnejad, S.M., Meyer, C., Chapat, C., Gogakos, T., Morozov, P., Amiri, M., Shapiro, M., Molina, H., Tuschl, T., et al. (2017). The E3 ubiquitin ligase and RNA-binding protein ZNF598 orchestrates ribosome quality control of premature polyadenylated mRNAs. *Nat Commun* *8*, 16056.
8. Juskiewicz, S., and Hegde, R.S. (2017). Initiation of Quality Control during Poly(A) Translation Requires Site-Specific Ribosome Ubiquitination. *Mol Cell* *65*, 743-750 e744.
9. Sundaramoorthy, E., Leonard, M., Mak, R., Liao, J., Fulzele, A., and Bennett, E.J. (2017). ZNF598 and RACK1 Regulate Mammalian Ribosome-Associated Quality Control Function by Mediating Regulatory 40S Ribosomal Ubiquitylation. *Mol Cell* *65*, 751-760 e754.
10. Joazeiro, C.A.P. (2017). Ribosomal Stalling During Translation: Providing Substrates for Ribosome-Associated Protein Quality Control. *Annu Rev Cell Dev Biol* *33*, 343-368.
11. Brandman, O., Stewart-Ornstein, J., Wong, D., Larson, A., Williams, C.C., Li, G.W., Zhou, S., King, D., Shen, P.S., Weibezahn, J., et al. (2012). A ribosome-bound quality control complex triggers degradation of nascent peptides and signals translation stress. *Cell* *151*, 1042-1054.
12. Hildebrandt, A., Bruggemann, M., Ruckle, C., Boerner, S., Heidelberger, J.B., Busch, A., Hanel, H., Voigt, A., Mockel, M.M., Ebersberger, S., et al. (2019). The RNA-binding ubiquitin ligase MKRN1 functions in ribosome-associated quality control of poly(A) translation. *Genome Biol* *20*, 216.
13. Clague, M.J., Urbe, S., and Komander, D. (2019). Breaking the chains: deubiquitylating enzyme specificity begets function. *Nat Rev Mol Cell Biol* *20*, 338-352.
14. Li, M., Brooks, C.L., Kon, N., and Gu, W. (2004). A dynamic role of HAUSP in the p53-Mdm2 pathway. *Mol Cell* *13*, 879-886.
15. Kategaya, L., Di Lello, P., Rouge, L., Pastor, R., Clark, K.R., Drummond, J., Kleinheinz, T., Lin, E., Upton, J.P., Prakash, S., et al. (2017). USP7 small-molecule inhibitors interfere with ubiquitin binding. *Nature* *550*, 534-538.
16. Lamberto, I., Liu, X., Seo, H.S., Schauer, N.J., Jacob, R.E., Hu, W., Das, D., Mikhailova, T., Weisberg, E.L., Engen, J.R., et al. (2017). Structure-Guided Development of a Potent and Selective Non-covalent Active-Site Inhibitor of USP7. *Cell Chem Biol* *24*, 1490-1500.
17. Turnbull, A.P., Ioannidis, S., Krajewski, W.W., Pinto-Fernandez, A., Heride, C., Martin, A.C.L., Tonkin, L.M., Townsend, E.C., Buker, S.M., Lancia, D.R., et al. (2017). Molecular basis of USP7 inhibition by selective small-molecule inhibitors. *Nature* *550*, 481-486.
18. Gavory, G., O'Dowd, C.R., Helm, M.D., Flasz, J., Arkoudis, E., Dossang, A., Hughes, C., Cassidy, E., McClelland, K., Odrzywol, E., et al. (2018). Discovery and characterization of highly potent and selective allosteric USP7 inhibitors. *Nature chemical biology* *14*, 118-125.
19. Harris, D.R., Mims, A., and Bunz, F. (2012). Genetic disruption of USP9X sensitizes colorectal cancer cells to 5-fluorouracil. *Cancer Biol Ther* *13*, 1319-1324.
20. Savio, M.G., Wollscheid, N., Cavallaro, E., Algisi, V., Di Fiore, P.P., Sigismund, S., Maspero, E., and Polo, S. (2016). USP9X Controls EGFR Fate by Deubiquitinating the Endocytic Adaptor Eps15. *Curr Biol* *26*, 173-183.
21. Li, X., Song, N., Liu, L., Liu, X., Ding, X., Song, X., Yang, S., Shan, L., Zhou, X., Su, D., et al. (2017). USP9X regulates centrosome duplication and promotes breast carcinogenesis. *Nat Commun* *8*, 14866.

22. Wang, Q., Tang, Y., Xu, Y., Xu, S., Jiang, Y., Dong, Q., Zhou, Y., and Ge, W. (2017). The X-linked deubiquitinase USP9X is an integral component of centrosome. *J Biol Chem* 292, 12874-12884.
23. Zhang, Y., Duan, C., Yang, J., Chen, S., Liu, Q., Zhou, L., Huang, Z., Xu, Y., and Xu, G. (2018). Deubiquitinating enzyme USP9X regulates cellular clock function by modulating the ubiquitination and degradation of a core circadian protein BMAL1. *Biochem J* 475, 1507-1522.
24. Reijnders, M.R., Zachariadis, V., Latour, B., Jolly, L., Mancini, G.M., Pfundt, R., Wu, K.M., van Ravenswaaij-Arts, C.M., Veenstra-Knol, H.E., Anderlid, B.M., et al. (2016). De Novo Loss-of-Function Mutations in USP9X Cause a Female-Specific Recognizable Syndrome with Developmental Delay and Congenital Malformations. *Am J Hum Genet* 98, 373-381.
25. Simsek, D., Tiu, G.C., Flynn, R.A., Byeon, G.W., Leppek, K., Xu, A.F., Chang, H.Y., and Barna, M. (2017). The Mammalian Ribo-interactome Reveals Ribosome Functional Diversity and Heterogeneity. *Cell* 169, 1051-1065 e1018.
26. Ritorto, M.S., Ewan, R., Perez-Oliva, A.B., Knebel, A., Buhrlage, S.J., Wightman, M., Kelly, S.M., Wood, N.T., Virdee, S., Gray, N.S., et al. (2014). Screening of DUB activity and specificity by MALDI-TOF mass spectrometry. *Nat Commun* 5, 4763.
27. Peterson, L.F., Sun, H., Liu, Y., Potu, H., Kandarpa, M., Ermann, M., Courtney, S.M., Young, M., Showalter, H.D., Sun, D., et al. (2015). Targeting deubiquitinase activity with a novel small-molecule inhibitor as therapy for B-cell malignancies. *Blood* 125, 3588-3597.
28. Chen, X., Yu, C., Gao, J., Zhu, H., Cui, B., Zhang, T., Zhou, Y., Liu, Q., He, H., Xiao, R., et al. (2018). A novel USP9X substrate TTK contributes to tumorigenesis in non-small-cell lung cancer. *Theranostics* 8, 2348-2360.
29. Clague, M.J., Heride, C., and Urbe, S. (2015). The demographics of the ubiquitin system. *Trends Cell Biol* 25, 417-426.
30. Behan, F.M., Iorio, F., Picco, G., Goncalves, E., Beaver, C.M., Migliardi, G., Santos, R., Rao, Y., Sassi, F., Pinnelli, M., et al. (2019). Prioritization of cancer therapeutic targets using CRISPR-Cas9 screens. *Nature* 568, 511-516.
31. Schwickart, M., Huang, X., Lill, J.R., Liu, J., Ferrando, R., French, D.M., Maecker, H., O'Rourke, K., Bazan, F., Eastham-Anderson, J., et al. (2010). Deubiquitinase USP9X stabilizes MCL1 and promotes tumour cell survival. *Nature* 463, 103-107.
32. Nielsen, C.P., Jernigan, K.K., Diggins, N.L., Webb, D.J., and MacGurn, J.A. (2019). USP9X Deubiquitylates DVL2 to Regulate WNT Pathway Specification. *Cell Rep* 28, 1074-1089 e1075.
33. Skowrya, A., Allan, L.A., Saurin, A.T., and Clarke, P.R. (2018). USP9X Limits Mitotic Checkpoint Complex Turnover to Strengthen the Spindle Assembly Checkpoint and Guard against Chromosomal Instability. *Cell Rep* 23, 852-865.
34. Han, K.J., Wu, Z., Pearson, C.G., Peng, J., Song, K., and Liu, C.W. (2019). Deubiquitylase USP9X maintains centriolar satellite integrity by stabilizing pericentriolar material 1 protein. *J Cell Sci* 132.
35. Garshott, D.M., Sundaramoorthy, E., Leonard, M., and Bennett, E.J. (2020). Distinct Regulatory Ribosomal Ubiquitylation events are reversible and hierarchically organized. *Elife* 9.
36. Harding, H.P., Ordonez, A., Allen, F., Parts, L., Inglis, A.J., Williams, R.L., and Ron, D. (2019). The ribosomal P-stalk couples amino acid starvation to GCN2 activation in mammalian cells. *Elife* 8.
37. Simms, C.L., Yan, L.L., Qiu, J.K., and Zaher, H.S. (2019). Ribosome Collisions Result in +1 Frameshifting in the Absence of No-Go Decay. *Cell Rep* 28, 1679-1689 e1674.
38. Follows, B., Kayser-Bricker, K.J., Talbot, A.C., Mente, S., Shelekhin, T., and Ericsson, A. (2020). Inhibiting Ubiquitin specific peptidase 9X. Volume WO/2020/061261.
39. Altun, M., Kramer, H.B., Willems, L.I., McDermott, J.L., Leach, C.A., Goldenberg, S.J., Kumar, K.G., Konietzny, R., Fischer, R., Kogan, E., et al. (2011). Activity-based chemical proteomics accelerates inhibitor development for deubiquitylating enzymes. *Chem Biol* 18, 1401-1412.
40. McGouran, J.F., Gaertner, S.R., Altun, M., Kramer, H.B., and Kessler, B.M. (2013). Deubiquitinating enzyme specificity for ubiquitin chain topology profiled by di-ubiquitin activity probes. *Chem Biol* 20, 1447-1455.
41. Borodovsky, A., Ovaa, H., Kolli, N., Gan-Erdene, T., Wilkinson, K.D., Ploegh, H.L., and Kessler, B.M. (2002). Chemistry-based functional proteomics reveals novel members of the deubiquitinating enzyme family. *Chem Biol* 9, 1149-1159.
42. Hochberg, Y., and Benjamini, Y. (1990). More powerful procedures for multiple significance testing. *Stat Med* 9, 811-818.

43. Davis, S., Charles, P.D., He, L., Mowlds, P., Kessler, B.M., and Fischer, R. (2017). Expanding Proteome Coverage with CHarge Ordered Parallel Ion aNalysis (CHOPIN) Combined with Broad Specificity Proteolysis. *J Proteome Res* *16*, 1288-1299.
44. Tyanova, S., Temu, T., and Cox, J. (2016). The MaxQuant computational platform for mass spectrometry-based shotgun proteomics. *Nat Protoc* *11*, 2301-2319.

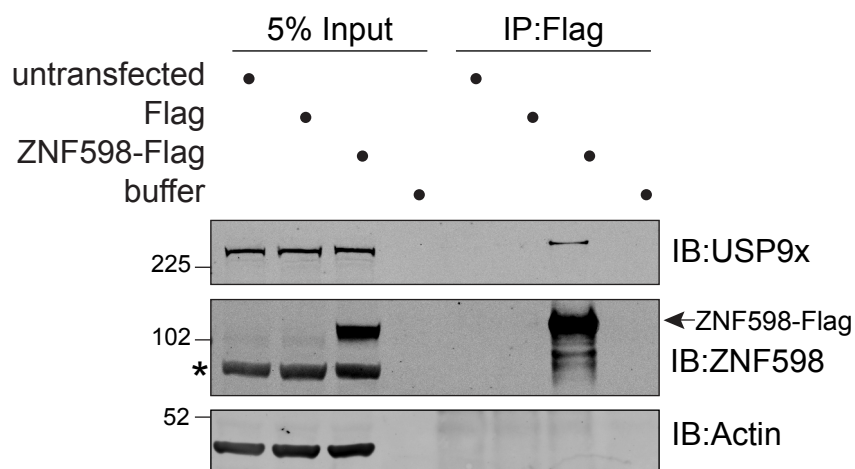

Figure 1

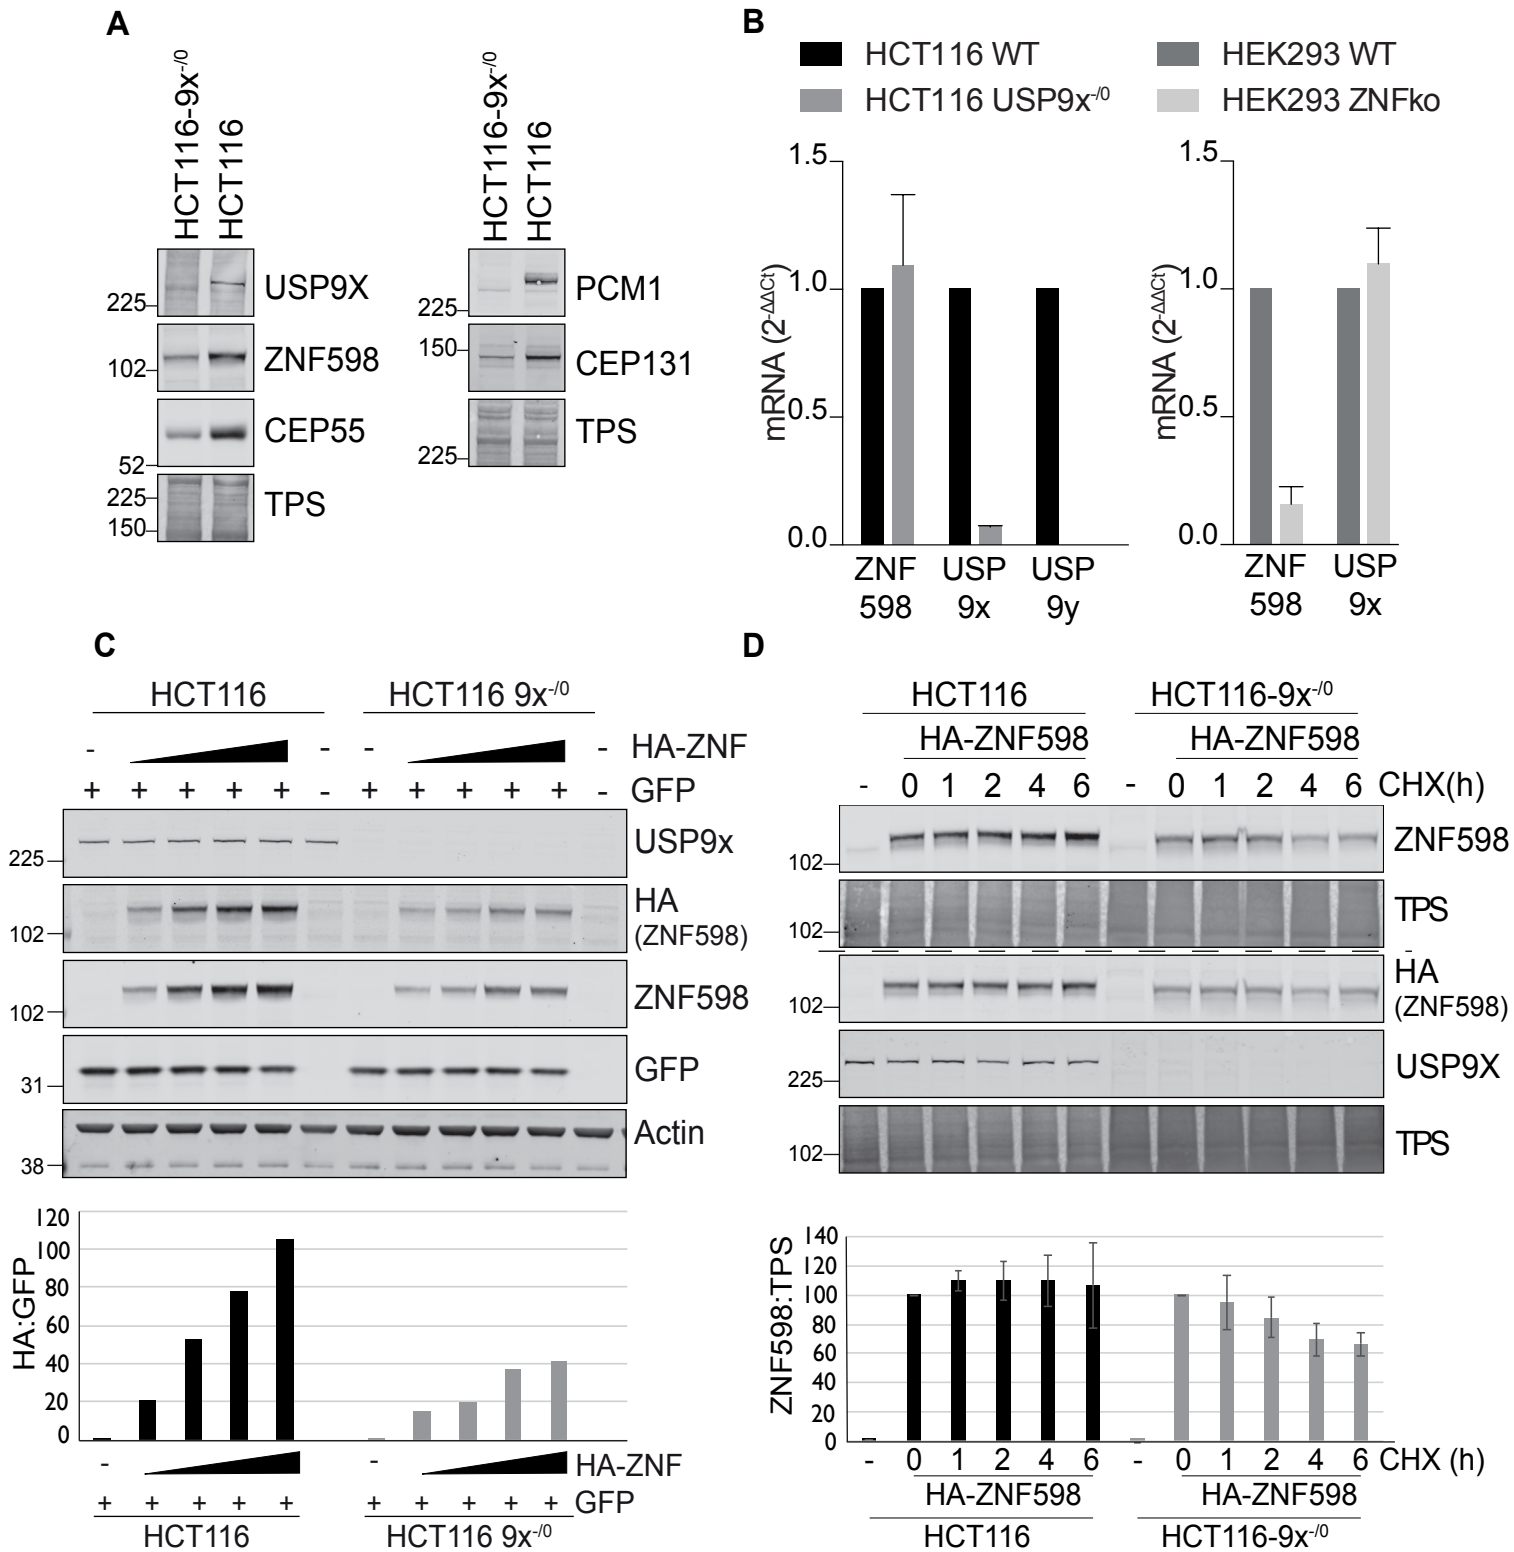

Figure 2



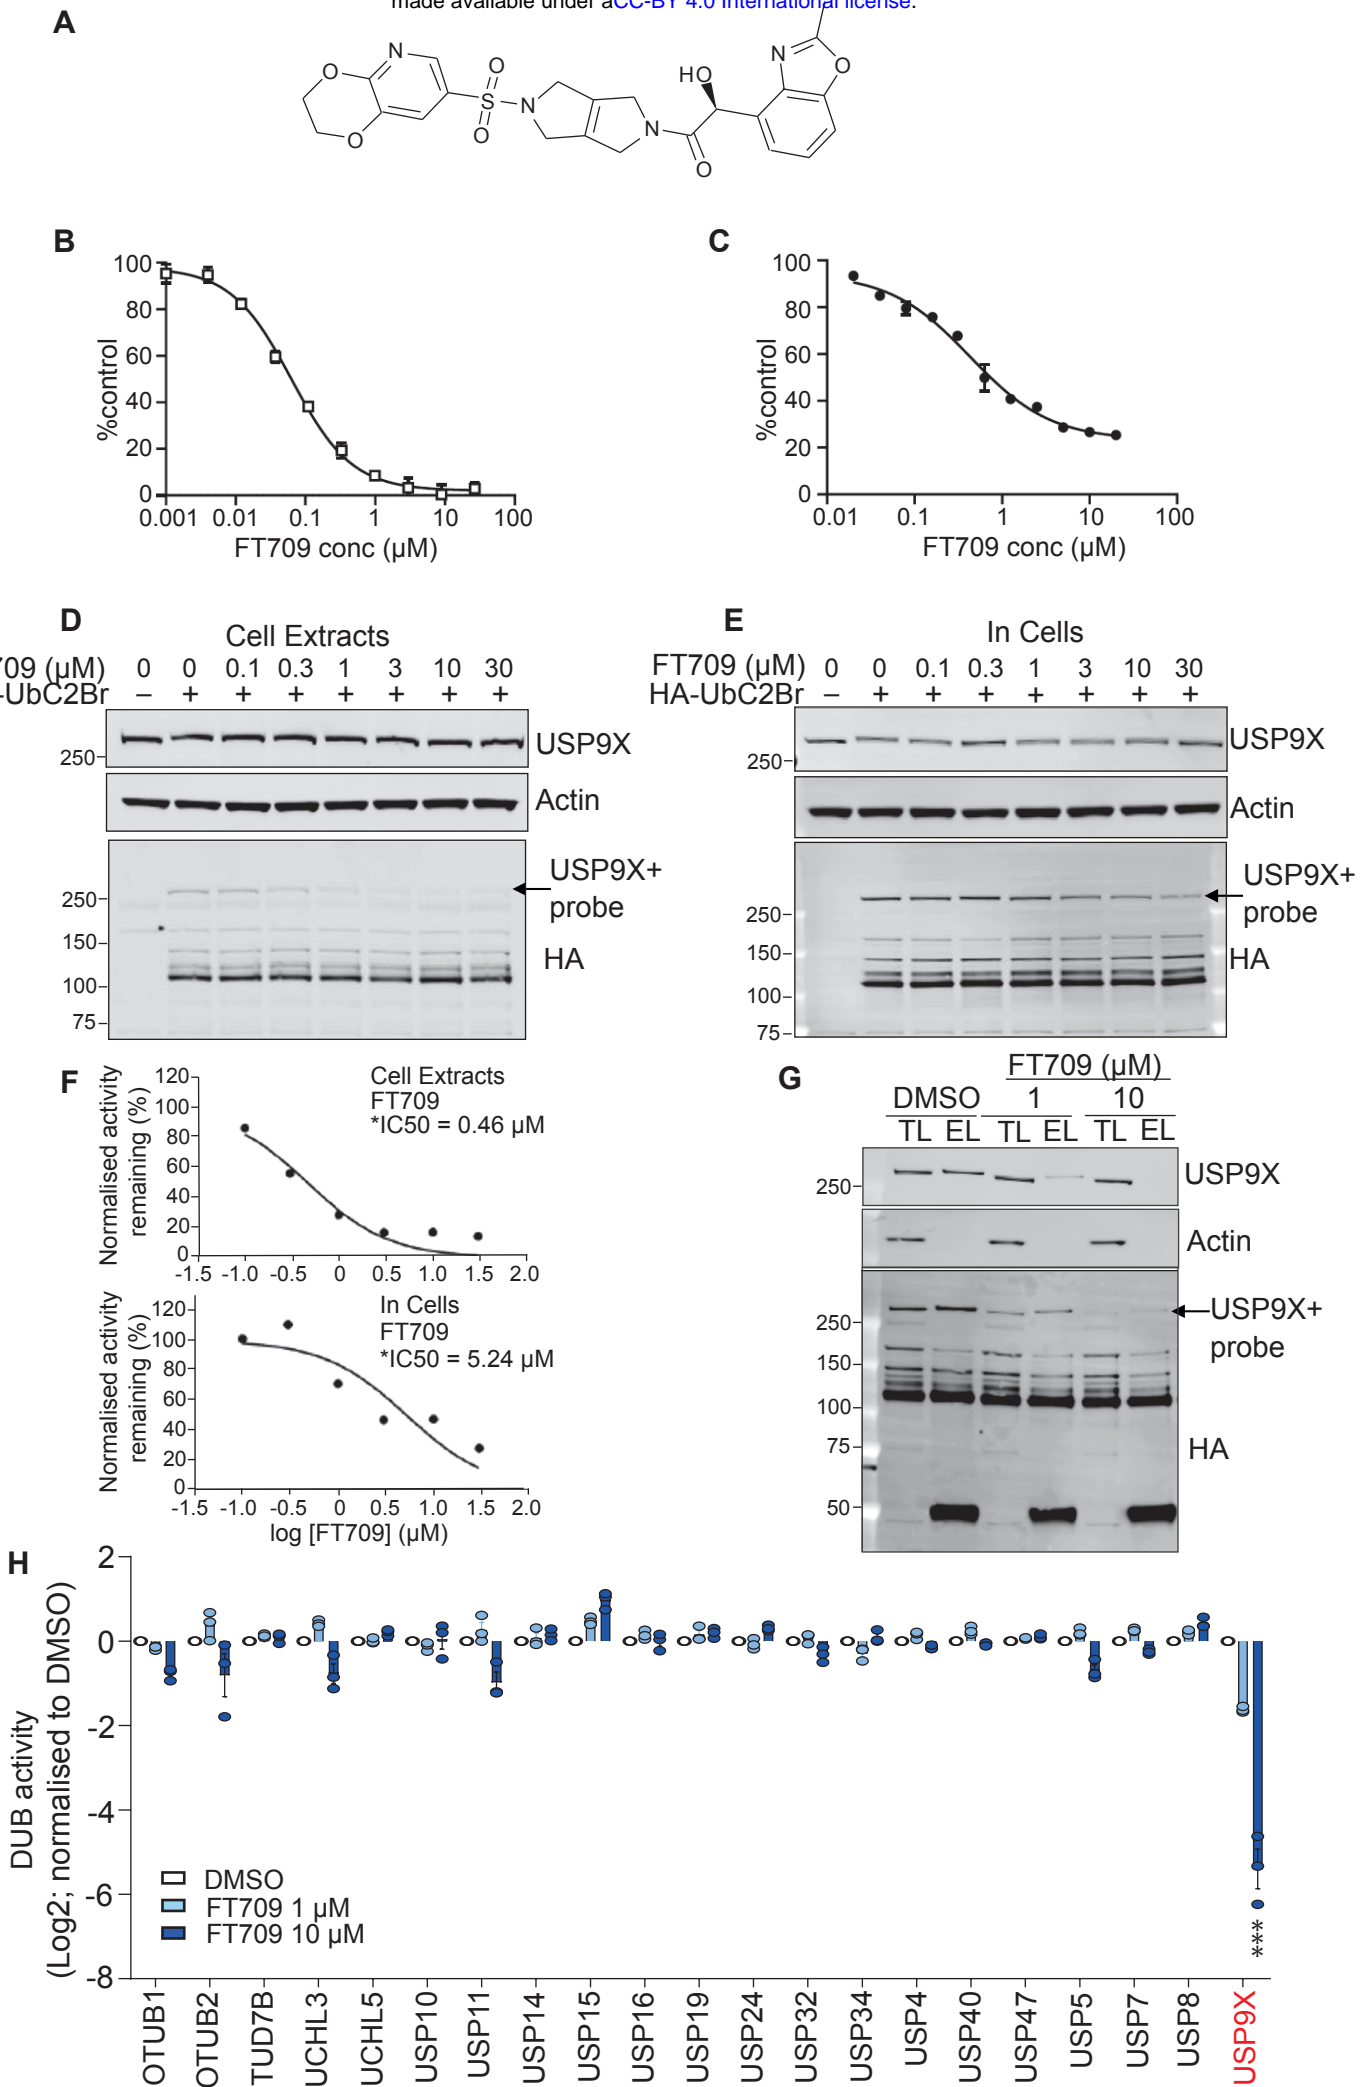

Figure 3

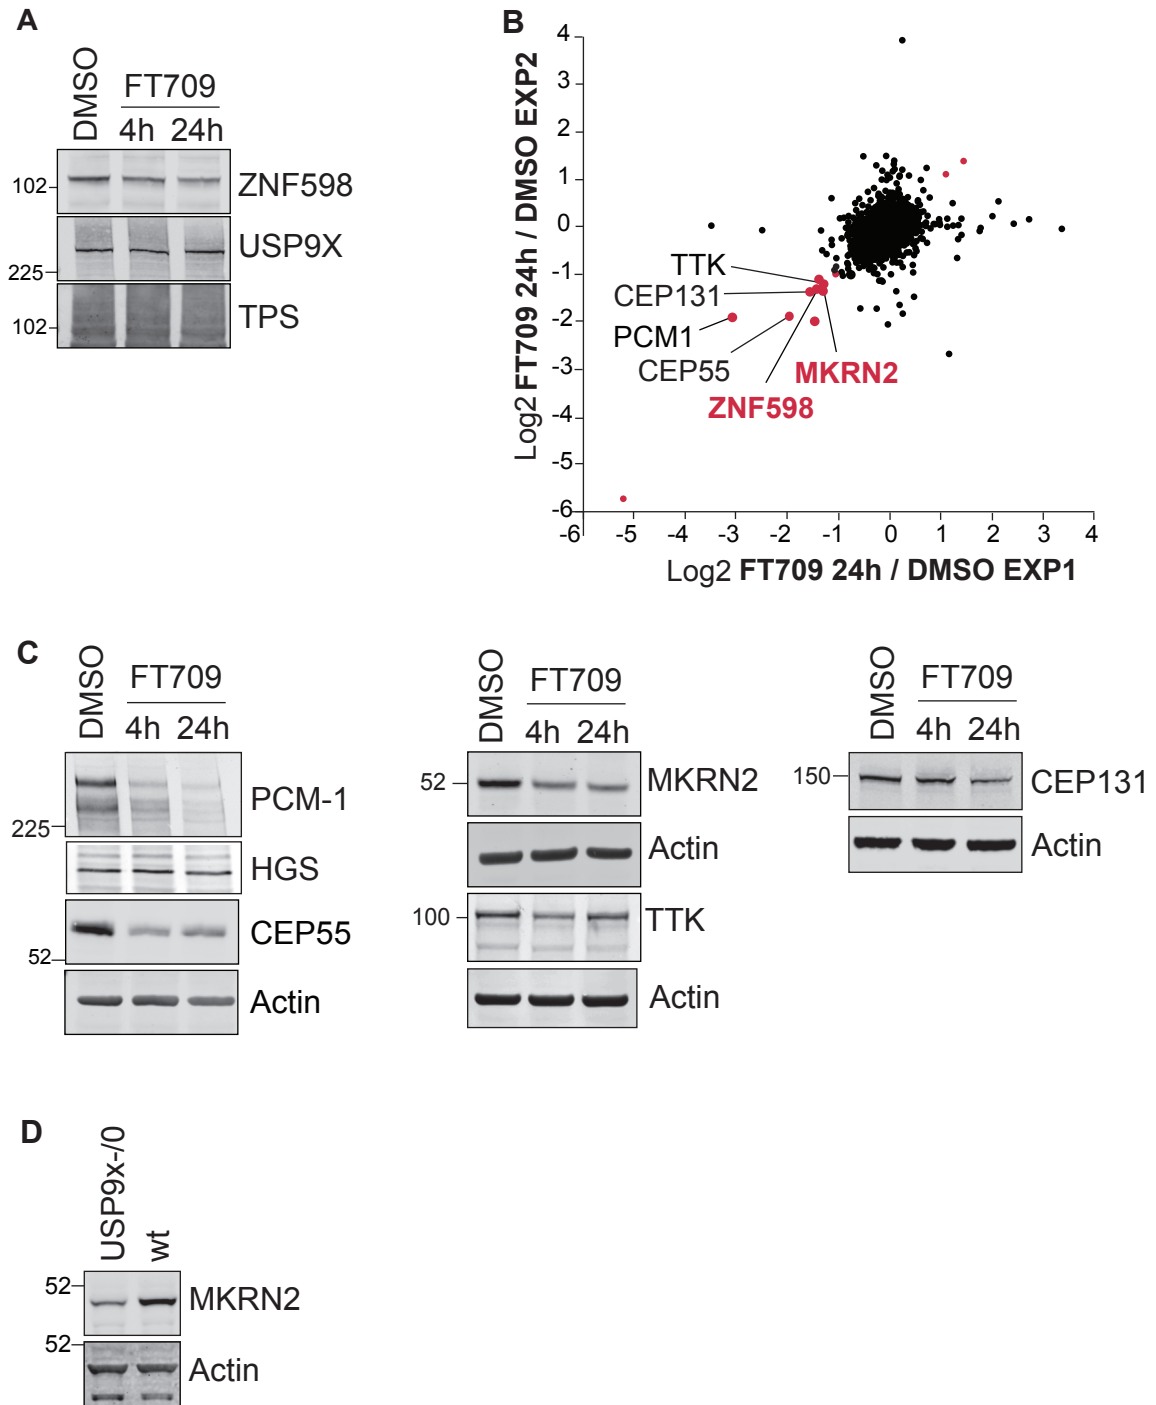

Figure 4

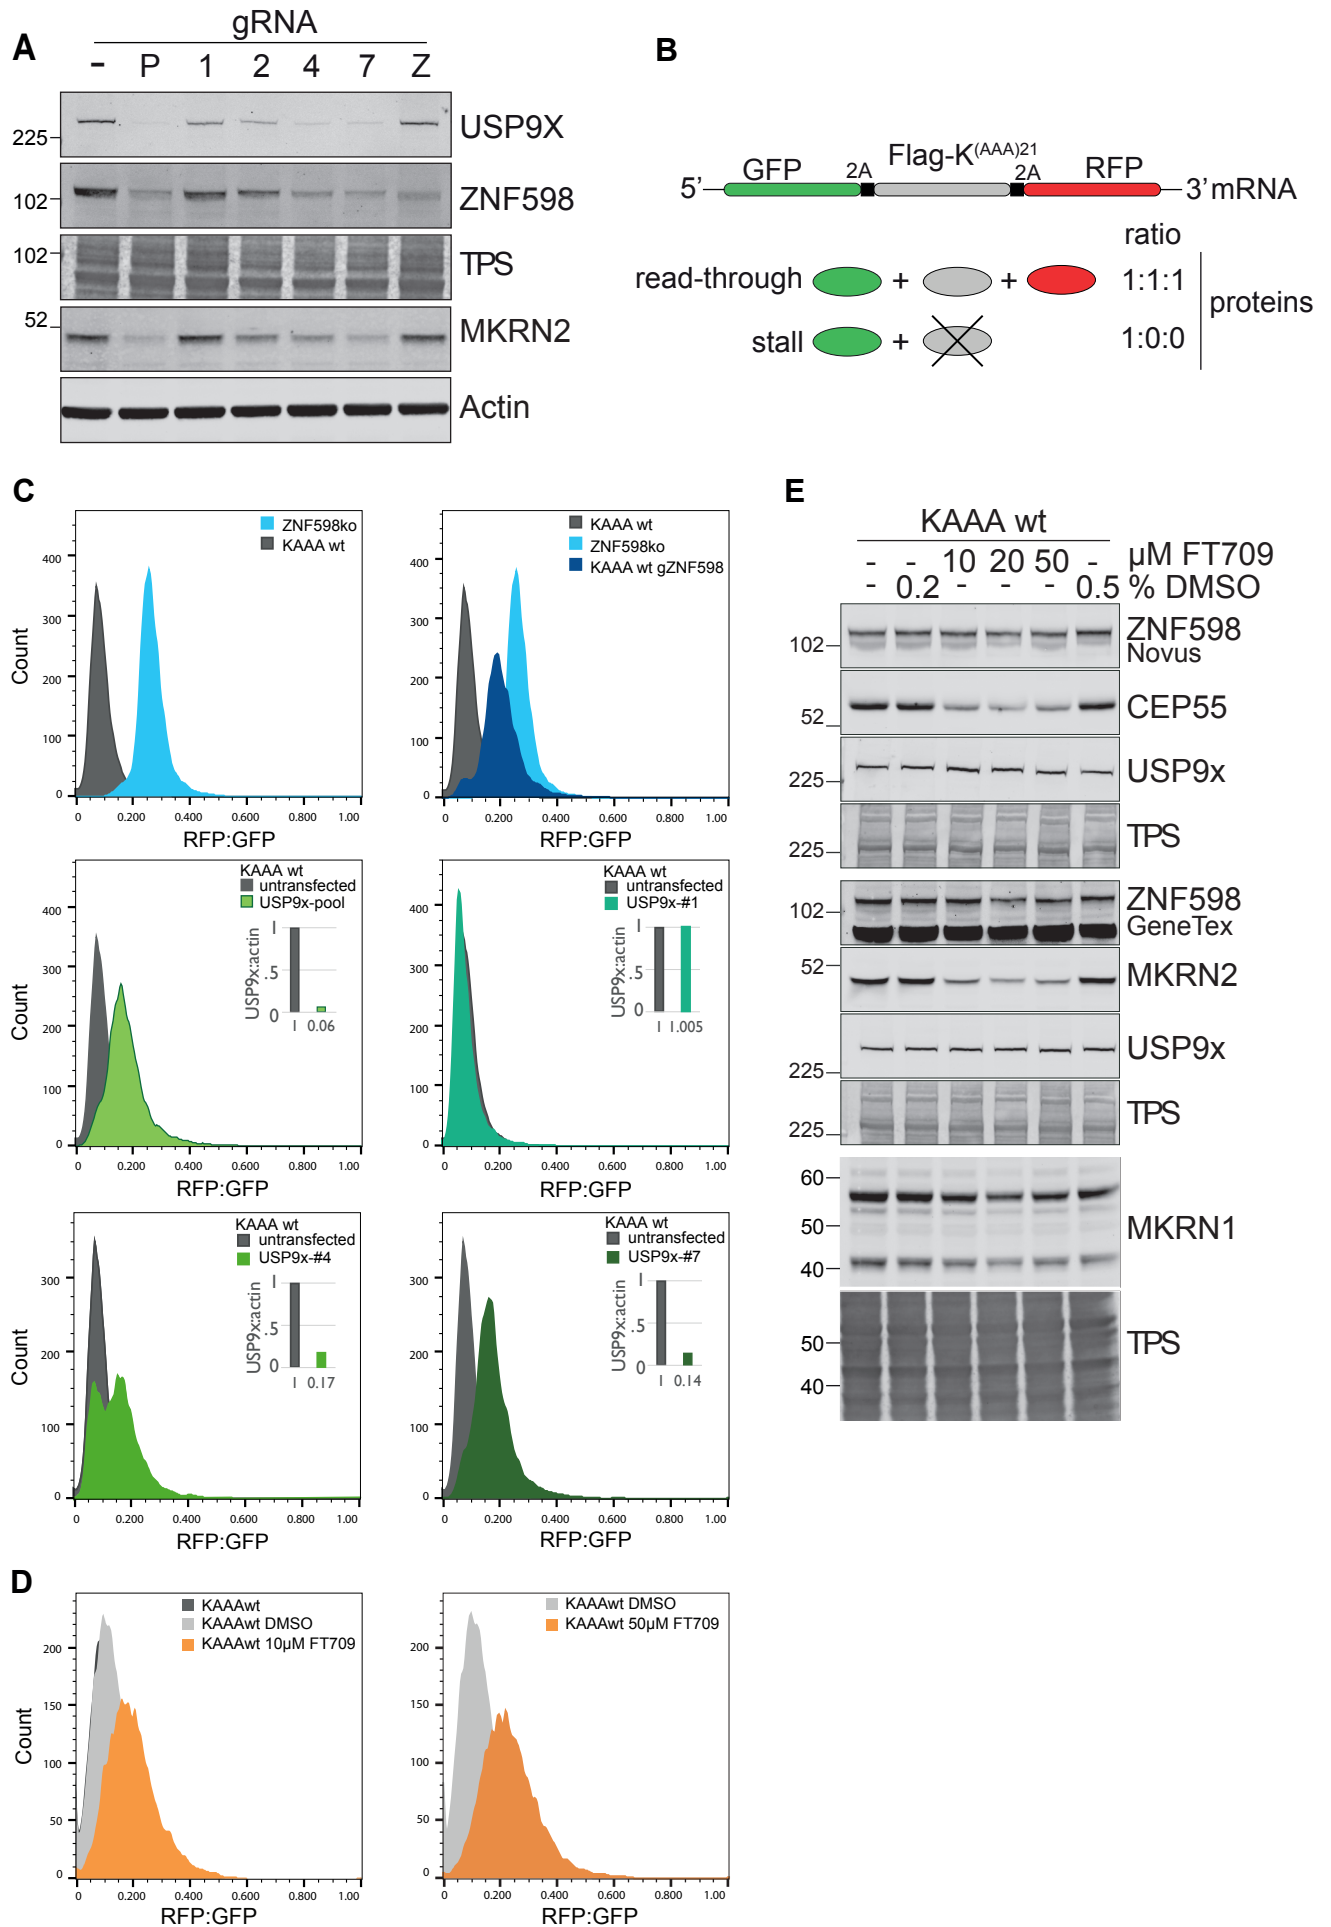

Figure 5

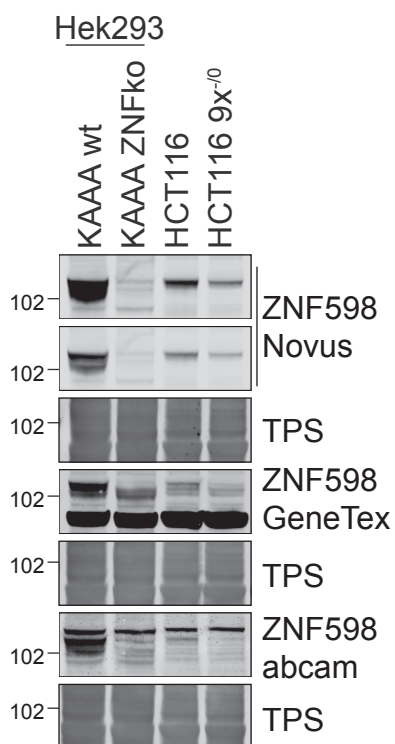

Supplementary Figure 1

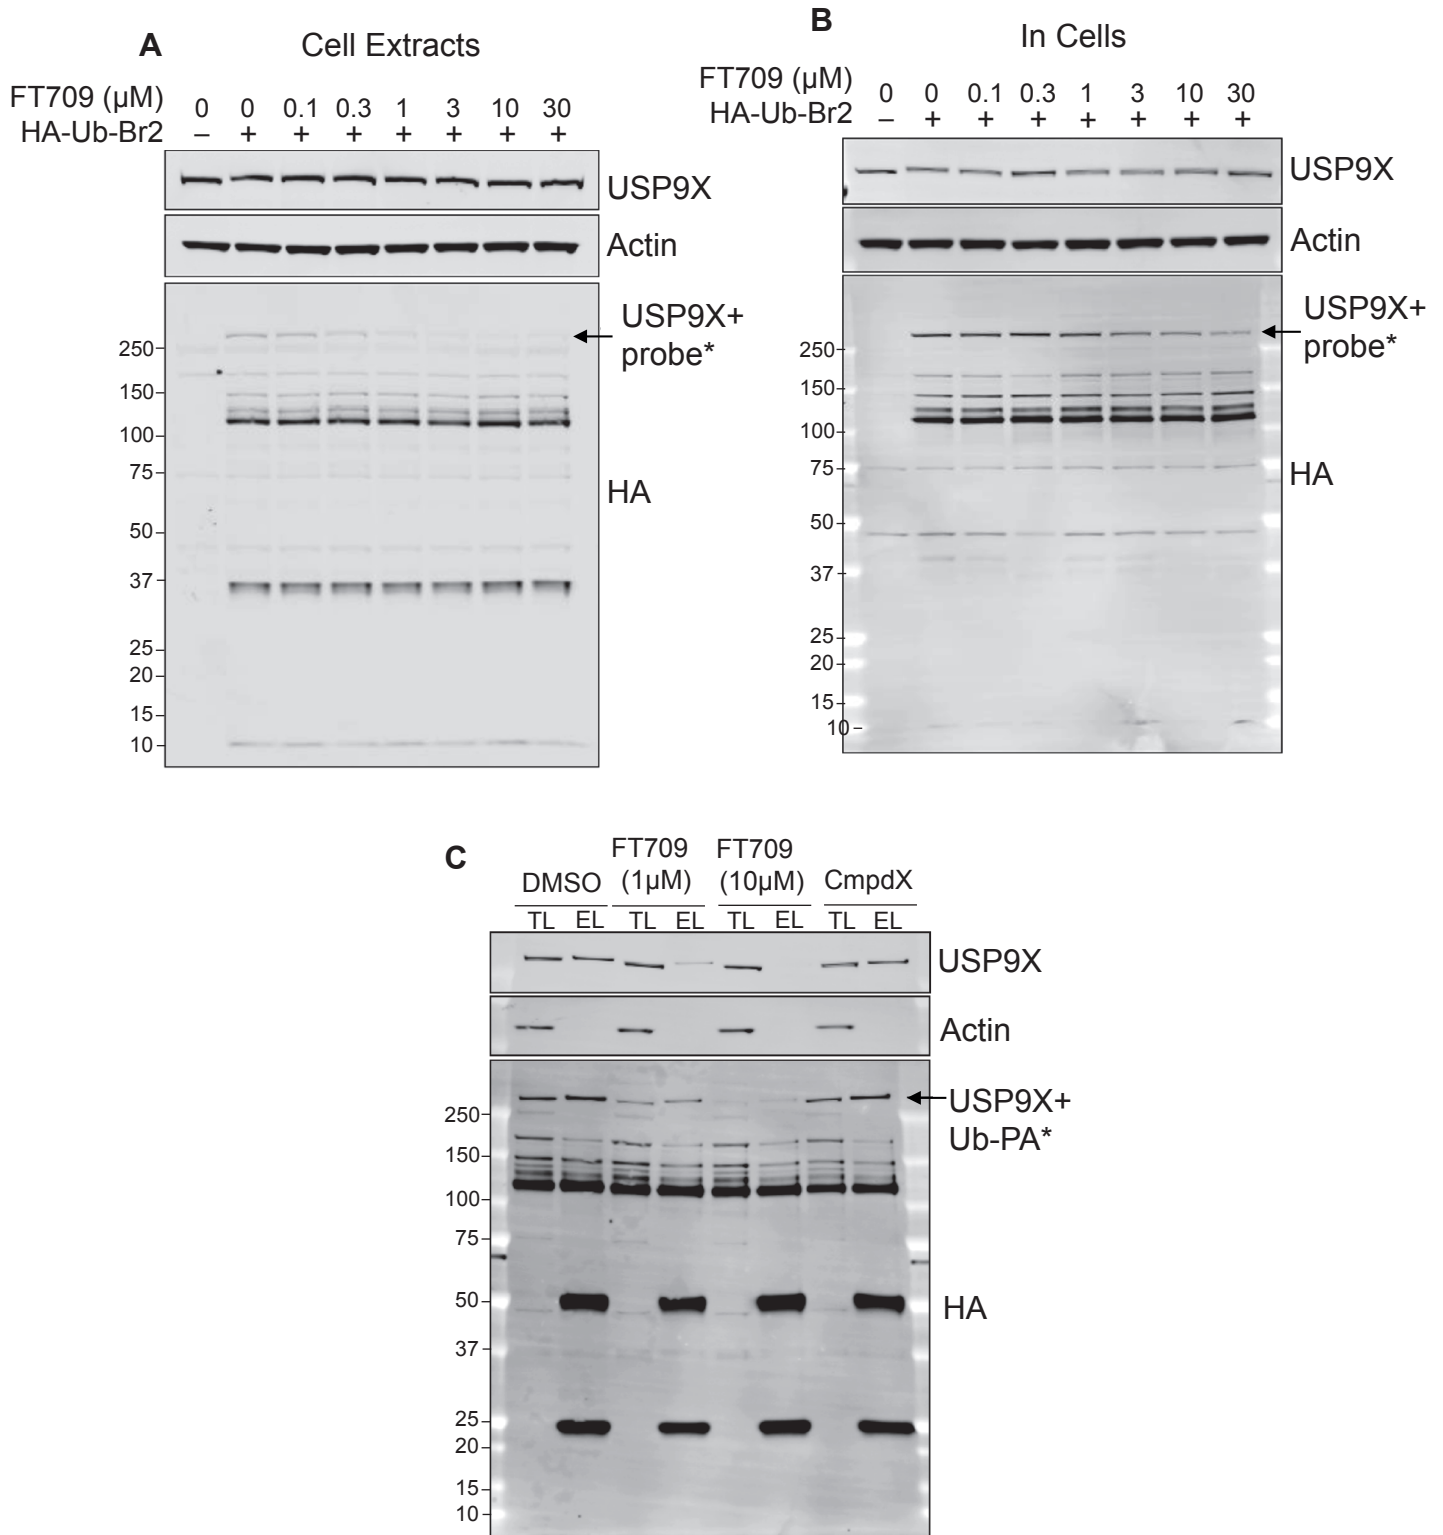

Supplementary Figure 2
